# Supplementary material
Source: publisher figshare collection journal article supplement (https://acs.figshare.com/ndownloader/files/3977095)
Supplement: Supplementary file 1 [file 3977095]

## **Supporting information**

### **Spectomycin B1 as a novel SUMOylation inhibitor that directly binds to SUMO E2**

Mikako Hirohama, Ashutosh Kumar, Isao Fukuda, Seiji Matsuoka, Yasuhiro Igarashi, Hisato Saitoh, Motoki Takagi, Kazuo Shin-ya, Kaori Honda, Yasumitsu Kondoh, Tamio Saito, Yoichi Nakao, Hiroyuki Osada, Kam Y. J. Zhang, Minoru Yoshida, and Akihiro Ito\*

\* Co-correspondence should be addressed to Akihiro Ito, E-mail: [akihiro-i@riken.jp](mailto:akihiro-i@riken.jp)

#### **Table of contents**

Supplemental Table S1

Supplemental Figure S1

Supplemental Figure S2

Supplemental Figure S3

Supplemental Method

**Supplemental Table S1.** Oligonucleotides sequences used for RT-PCR

| <b>Oligonucleotides</b>  | <b>Sequence</b>                 |
|--------------------------|---------------------------------|
| pS2 sense                | 5'-CCCCTGGTGCTTCTATCCTAA-3'     |
| pS2 antisense            | 5'-GATCCCTGCAGAAGTGTCTAAAA-3'   |
| Ubc9 sense               | 5'-GGCACGATGAACCTCATGAA-3'      |
| Ubc9 antisense           | 5'-TCCCACGGAGTCCCTTTCT-3'       |
| Uba2 sense               | 5'-TCAAGAAGTATCTCCTGACAGAGC-3'  |
| Uba2 antisense           | 5'-TGCTCTAGCTCTGGCTTCG-3'       |
| $\beta$ -actin sense     | 5'-ATGAAGATCAAGATCATTGCTCCTC-3' |
| $\beta$ -actin antisense | 5'-ACATCTGCTGGAAGGTGGACA-3'     |

**a**

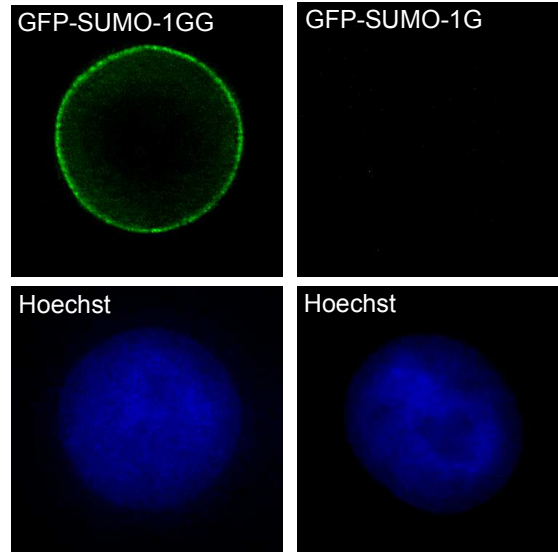

**b**

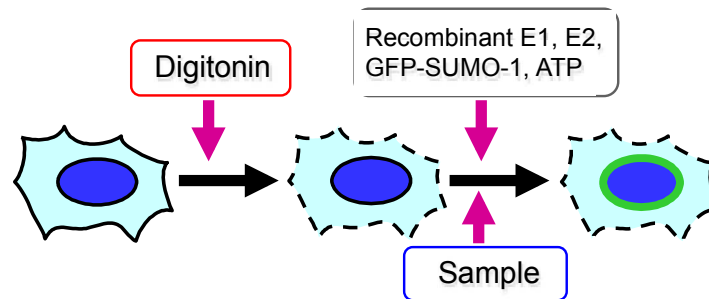

**Supplemental Figure S1.** System of screening for SUMOylation inhibitors. **(a)** *In situ* SUMOylation assay. *In situ* SUMOylation assay was performed as described in the Supplemental Method. GFP-SUMO-1GG but not GFP-SUMO-1G, defective mutant for SUMO conjugation activity, accumulated around the nuclear rim, indicating that the GFP signal at nuclear rim is attributed to SUMO conjugation activity in semi-intact cells. **(b)** Schematic model of the *in situ* cell-based screening system.

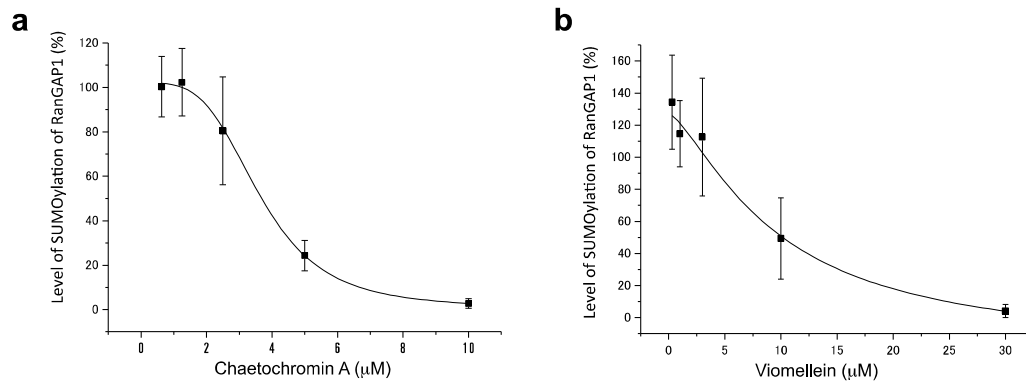

**Supplemental Figure S2.** Dose dependent inhibition of *in vitro* SUMOylation by chaetochromin A (a) and viomellein (b). The error bars show the standard deviations from three independent assays.

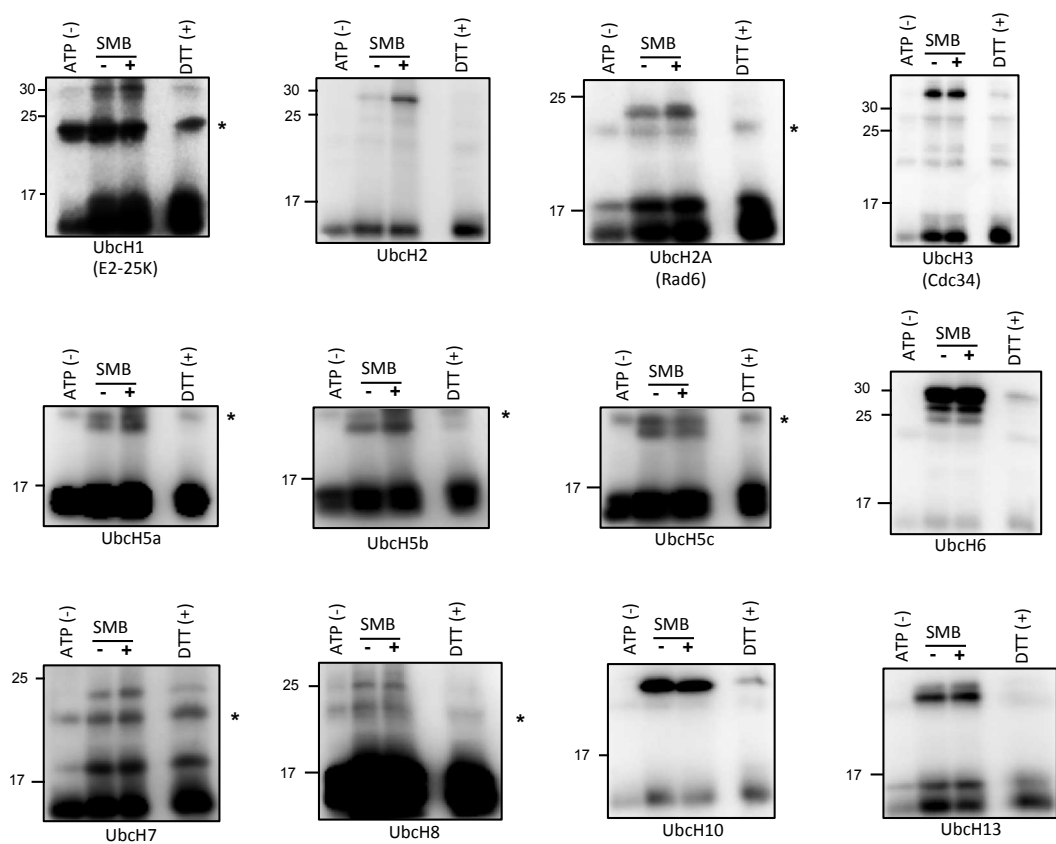

**Supplemental Figure S3.** Effects of spectomycin B1 and DTT on thioester-bond formation between various ubiquitin E2s and biotinylated ubiquitin. The asterisk represents a non-specific band.

## **Supplemental Method**

### ***In situ* SUMOylation Assay**

HeLa cells were grown on a 96-well plate, briefly rinsed with cold TRB buffer (20 mM HEPES [pH 7.3], 110 mM KOAc, 2 mM MgCl<sub>2</sub>, 1 mM EGTA, 2 mM DTT) and permeabilized with TRB buffer containing 50 µg/ml digitonin (Calbiochem, Darmstadt, Germany) for 5 min on ice. After the cells were rinsed twice with ice-cold TRB buffer, 100 µl of assay solution containing 0.2 µg of GST-Aos1/Uba2 (E1), 0.2 µg of His-tagged Ubc9 (E2), 2 µg of GFP-SUMO, and ATP was added and incubated for 15 min at 30°C. The cells were washed with pre-warmed TRB buffer for 5 min at 30°C, followed by fixation with 3.7% formaldehyde in PBS for 15 min at room temperature. The cells were rinsed three times with PBS for 5 min, and then treated with 1 mg/ml Hoechst 33342 (Invitrogen) for 5 min. GFP signal around the nuclear rim was observed using a DeltaVision fluorescent microscope (GE Healthcare).
